# Supplementary material for: Preventing the Separation of Urban Humans from Nature: The Impact of Pet and Plant Diversity on Biodiversity Loss Belief
Source: MDPI journal article supplement (doi:10.3390/urbansci7020046), 2023-04-25
Supplement: s1 [file s1]

## Supplementary Materials

Table S1. Results of Model 1 with uninformative priors

| Parameters      | Mean | SD   | n_eff | Rhat |
|-----------------|------|------|-------|------|
| Constant        | 1.58 | 0.05 | 5470  | 1    |
| PlantDiversity  | 0.17 | 0.07 | 6154  | 1    |
| AnimalDiversity | 0.08 | 0.17 | 5712  | 1    |

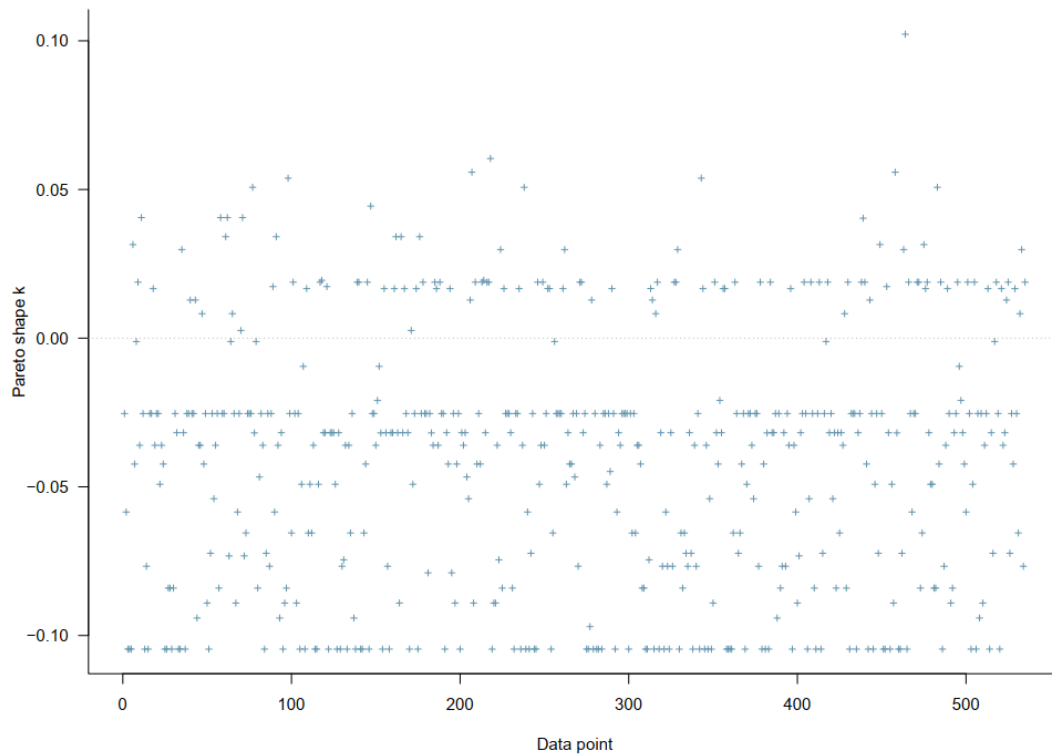

Figure S1. Model 1's PSIS-LOO diagnosis plots with uninformative priors

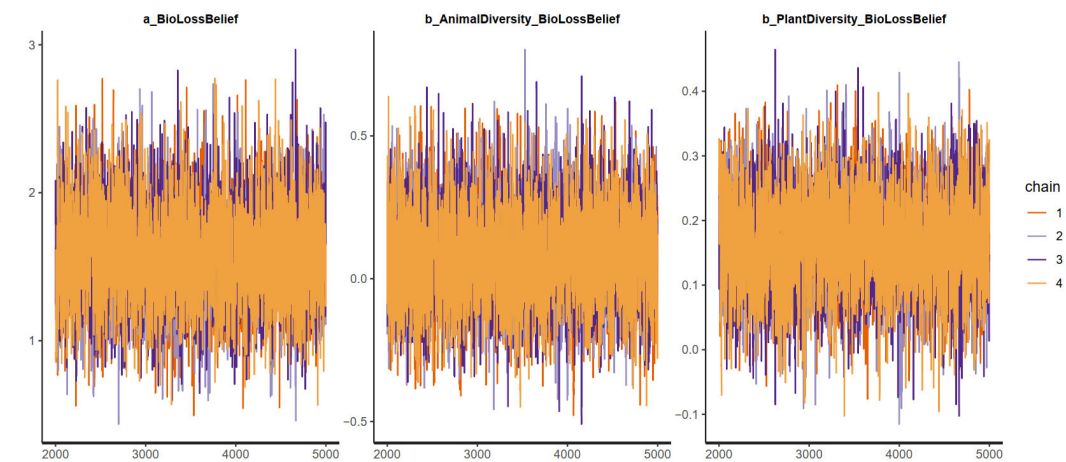

Figure S2. Model 1's trace plots with uninformative priors

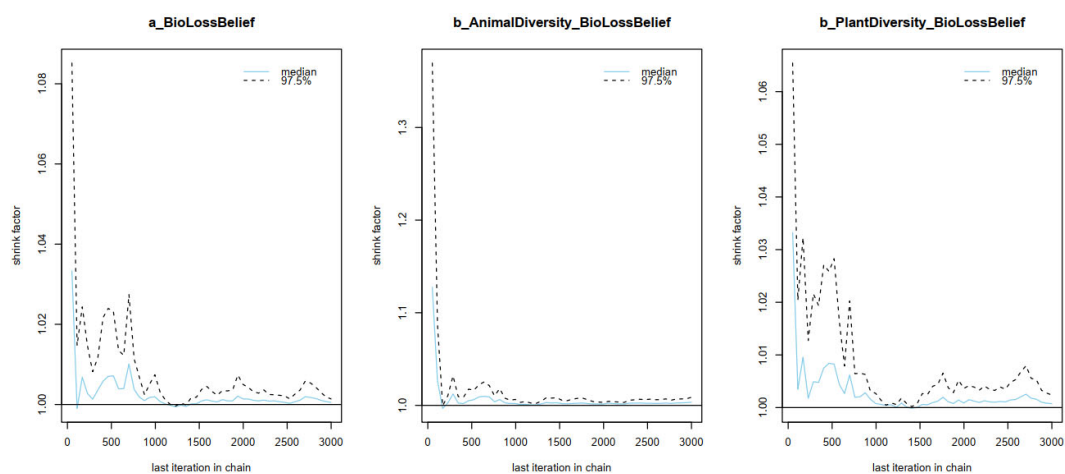

Figure S3. Model 1's Gelman–Rubin–Brooks plots with uninformative priors

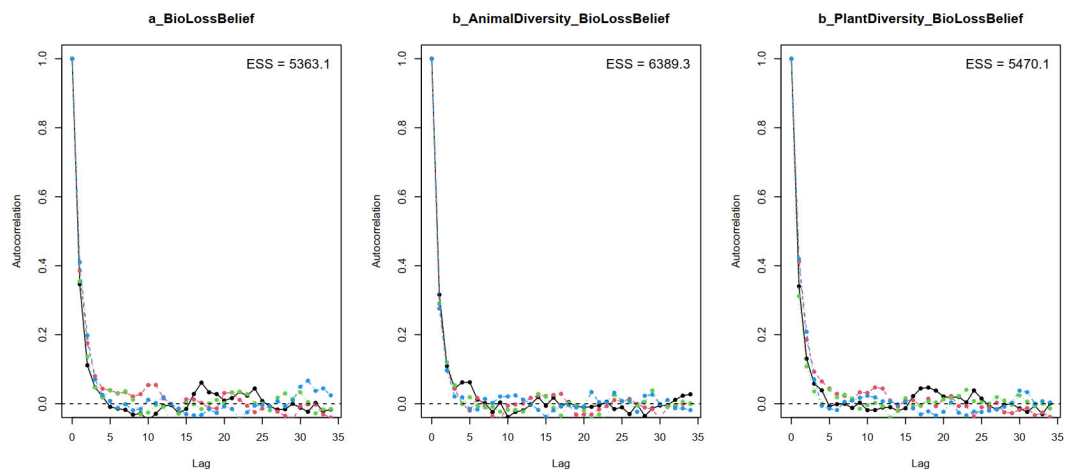

Figure S4. Model 1's autocorrelation plots with uninformative priors

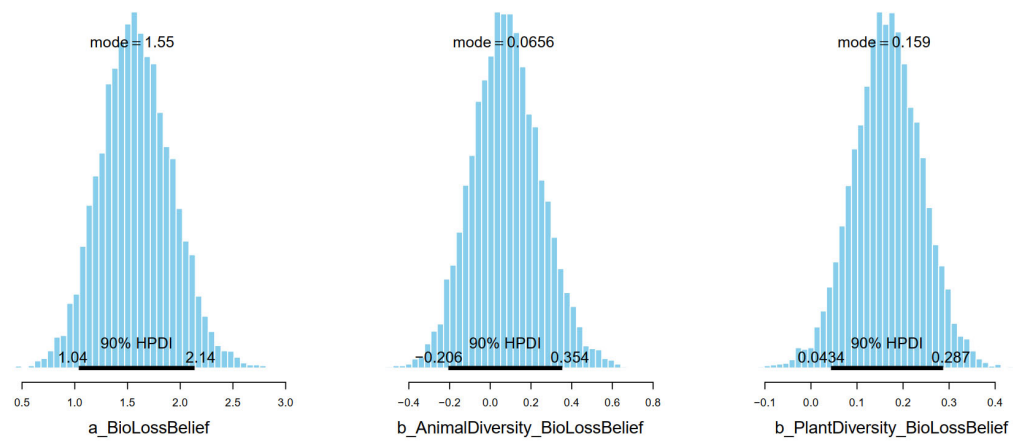

Figure S5. Model 1's posterior distributions with uninformative priors
